# Supplementary material
Source: publisher figshare collection journal article supplement (https://gsapubs.figshare.com/ndownloader/files/23306000)
Supplement: Supplementary file 1 [file 23306000]

Manzini et al., 2017, Weekly to monthly time scale of melt inclusion entrapment prior to eruption recorded by phosphorus distribution in olivine from mid-ocean ridges: *Geology*, doi:10.1130/G39463.1.

## **Supplementary data**

## **Methodology**

### ***Sample preparation***

Polished olivine grains with melt inclusions exposed at the surface were pressed into 1-inch indium mounts. Different glasses and San Carlos olivine were added to the sample mount to be used as reference material for P content determination by SIMS (see below).

To ensure that the melt inclusions were totally glassy, we acquired SEM images with a Tescan Mira LMU scanning electron microscope at the University of Lausanne.

### ***Electron microprobe***

All samples were analyzed by a JEOL 8200 Superprobe at the University of Lausanne. Analytical conditions for major element measurements in olivine were 15kV acceleration voltage, 20nA beam current and 5  $\mu\text{m}$  beam size. Counting time was 30 sec for Si, Mg, Mn, Al and Fe and 40 sec for Ca, Ni and Cr. Natural minerals and synthetic oxides were used as standards. Analytical conditions for major element analyses in melt inclusions were 15kV, 10nA and 10  $\mu\text{m}$ . Counting time was 30 sec on all elements, except for K (20 sec) and Na (16 sec). A glass standard (KL2-G) was used for  $\text{SiO}_2$ ,  $\text{Al}_2\text{O}_3$ . Other elements were calibrated on specific minerals (e.g., a fayalite for Fe). ML3B-G was used as internal standard to check the calibration. Post-entrapment modification due to olivine crystallization (PEC% (% olivine

added), Table DR1) at the wall of melt inclusion was corrected for using the Petrolog software (Danyushevsky et al., 2000, 2002; Danyushevsky and Plechov, 2011).

X-rays distribution maps of melt inclusions and olivines were acquired by electron microprobe using a JEOL 8200 Superprobe at University of Lausanne. Analytical conditions were 15 kV, 10 nA, 0-1  $\mu\text{m}$  probe diameter and 100 ms dwell-time with a 1-2  $\mu\text{m}$  pixel size for major elements and 15kV, 200-250nA, 0-1  $\mu\text{m}$  probe diameter and 100-230 ms dwell-time with a 1  $\mu\text{m}$  pixel size for P, Al, Ni and Ca. X-ray elemental maps display higher count rate for P in MI compared to P-zoned olivine, as a result of the overlapping of the Ca ( $K\beta$ ) second order peak with the P ( $K\alpha$ ) peak. As olivine contains much less Ca than glass, the interference is negligible in olivine but not in MI. In any case, as olivine is homogeneous in Ca (Figure DR2), the structure on the phosphorus maps and profiles are only caused by variable P concentrations.

### **Secondary ion mass spectrometer**

P concentrations in olivines and melt inclusions were analysed using a Cameca 1280-HR SIMS at the SwissSIMS laboratory (Lausanne, Switzerland). San Carlos (P = 40 ppm; Welsch et al., 2014) was used as standard for the olivine and BHVO-2G, BCR-2G, BIR-1G (P concentrations are from the certified values furnished by USGS) for the melt inclusions. Samples were sputtered with a 10 kV  $^{133}\text{Cs}^+$  primary beam of 1 nA. Electron gun was used to compensate sample charge. A 15 $\mu\text{m}$  raster was used during pre-sputtering (90 sec) and analyses. Counting time was 0.48 s on 29.9 (background), 1.04 s on  $^{30}\text{Si}$  and 2.96 sec on  $^{31}\text{P}$ . Waiting time was 0.8 s between each mass. Total time for each analysis was <6 min, including automatic centering of the secondary beam.  $^{30}\text{Si}$  and  $^{31}\text{P}$  were detected on an axial electron multiplier. Entrance slit was set to 60  $\mu\text{m}$  and exit slit to 200  $\mu\text{m}$ , resulting in ~6000 mass resolving power. Field aperture was closed to 4000  $\mu\text{m}$ . Energy slit was 50 eV.

Uncertainty on each point measurement (internal error) was  $< 5\%$  ( $2\sigma$  %, average uncertainty of  $0.95\%$   $2\sigma$ ) for P in olivine and  $<0.8\%$  ( $2\sigma$  %, average uncertainty of  $0.2\%$   $2\sigma$ ) in melt inclusion. The difference in reproducibility is due to counting statistic, melt inclusions having 100 times more counts on P. Reproducibility on the standard was  $< 4.5\%$  (2SD) on the San Carlos and  $<1\%$  (2SD) on BCR-2G.

### **Nanoscale secondary ion mass spectrometer**

Profiles in olivines were obtained using the NanoSIMS at the Center of Advanced Surface Analysis (CASA, Lausanne, Switzerland). A  $\text{Cs}^+$  primary beam was used to sputter olivine and the ion species  $^{16}\text{O}^-$ ,  $^{28}\text{Si}^-$ ,  $^{31}\text{P}^-$ ,  $^{24}\text{Mg}^{16}\text{O}^-$ ,  $^{27}\text{Al}^{16}\text{O}^-$  and  $^{31}\text{P}^{16}\text{O}^-$  were extracted and measured using electron multipliers. In order to prevent the build-up of a charge on the sample's surface, the surfaces were coated with a 10-15nm gold layer. MRP was  $> 8000$  and no peak overlap was observed.

After identification of the area of interest using the CCD camera of the NanoSIMS, a  $25 \times 25 \mu\text{m}$  image of the area of interest was first acquired (with a  $256 \times 256$  pixel resolution corresponding to a pixel size  $\sim 100 \text{ nm}$ ). Using the NanoSIMS software, the locations of the linescan were precisely selected to be perpendicular to the transition identified by EMPA analyses. The line scans were acquired using a two-step approach. First a pre-sputtering phase was performed for 2 cycles with a dwell time of 2sec/pixel, using slightly larger beam size to clean up the surface (diaphragm D1-2, and 3.8pA for the  $\text{Cs}^+$  primary beam). The acquisition of the high resolution line scans were performed using a finer beam (D1-3,  $\sim 150\text{nm}$ , and 1.7pA for the  $\text{Cs}^+$  beam) over 5 cycles with 2sec/pixel.  $^{24}\text{Mg}^{16}\text{O}^-$  data were used to monitor possible local variation in the ionization and extraction processes as it is expected to be homogeneous in the olivine measured.  $^{16}\text{O}$ ,  $^{18}\text{O}$ ,  $^{24}\text{Mg}$ ,  $^{27}\text{Al}$ ,  $^{28}\text{Si}$ ,  $^{31}\text{P}$  and  $^{31}\text{P}^{16}\text{O}$  were acquired at the same time. In order to minimize the instrumental drift, we normalized the profiles to  $^{28}\text{Si}$ , which is, based on EMPA X-ray maps, homogeneous within the olivine and

the MI. The NanoSIMS session was not standardized, resulting in a  $^{31}\text{P}$  count rate higher in the MI than in P-zoned olivine, due to matrix effects.

## **Diffusion Chronometry and Fit of Diffusion Profiles**

The 2D profiles were measured perpendicular to the zonation. The following parameters were assumed for the diffusion calculations and fitting of the profiles: 1- each P-enriched band was homogeneous at the beginning or represents a line source; 2- the contact between the P-rich and P-poor zones was a step function. Thin, linear features with no plateau were modelled as a line source, while P-enriched zones displaying a plateau were modeled as step functions. Specifically, a P-peak of a few  $\mu\text{m}$  width (e.g. Fig. 2) was modelled as line source, while b) P-enriched zones larger than 10  $\mu\text{m}$  were modelled as individual step functions (e.g. Fig. DR5).

We used the diffusion coefficient for P diffusion in olivine reported by Watson et al. (2015) based on their diffusion experiments in olivine which are  $\log(D_0, \text{m}^2/\text{s}) = -10.06 \pm 0.80$  and  $E_a = 229 \pm 16 \text{ kJ/mol}$ . Error functions were fit to each of the measured profiles using a weighted Marquardt fitting routine (Press et al., 1992).

The uncertainty of the fit was estimated using the  $\chi^2$  per point. The uncertainty, expressed as  $2\sigma$ , for each point was estimated from the variation in the part of the profiles considered to be flat. Initial conditions of the model are the bigger source of uncertainty. Since the line source diffusion modeling assumes an infinite band width of P-enrichment, the calculated values are maximum time estimates.

## **MELTS calculations**

MELTS version 5.0 was used. The principles of the program are summarised in Ghiorso and Sack (1995). We used the average composition of the individual melt inclusions and 0.15 wt%  $\text{H}_2\text{O}$ . We then determined the liquidus temperature, followed by decompression calculations slightly below the liquidus temperature. Isentropic, isenthalpic and isothermal decompression

calculations were done between 2 kbar and 0.1 kbar in steps of 0.1 kbar, with a fixed  $fO_2$  (QFM -2).

## Figures

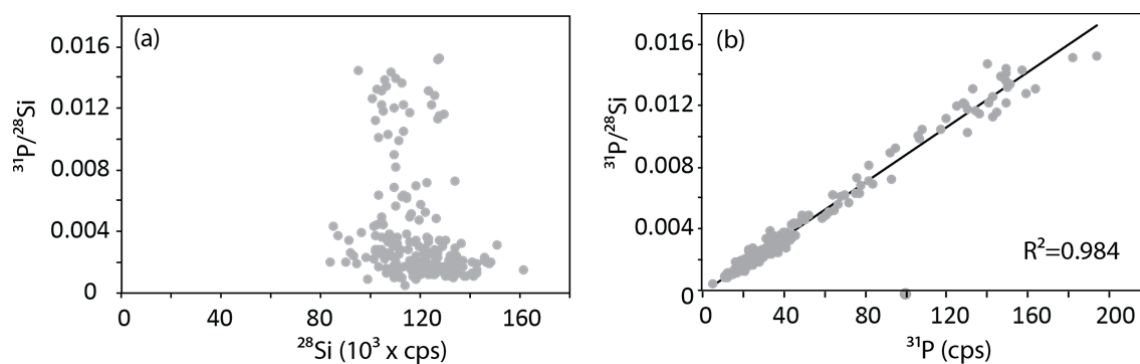

Figure DR1: Plot of  $^{31}\text{P}/^{28}\text{Si}$  ratios obtained during NanoSIMS measurements versus (a)  $^{48}\text{Si}$  counts and (b)  $^{31}\text{P}$  counts. The absence of correlation in (a) and the good correlation in (b) indicates that  $^{31}\text{P}/^{28}\text{Si}$  ratio depends on  $^{31}\text{P}$  concentration only.

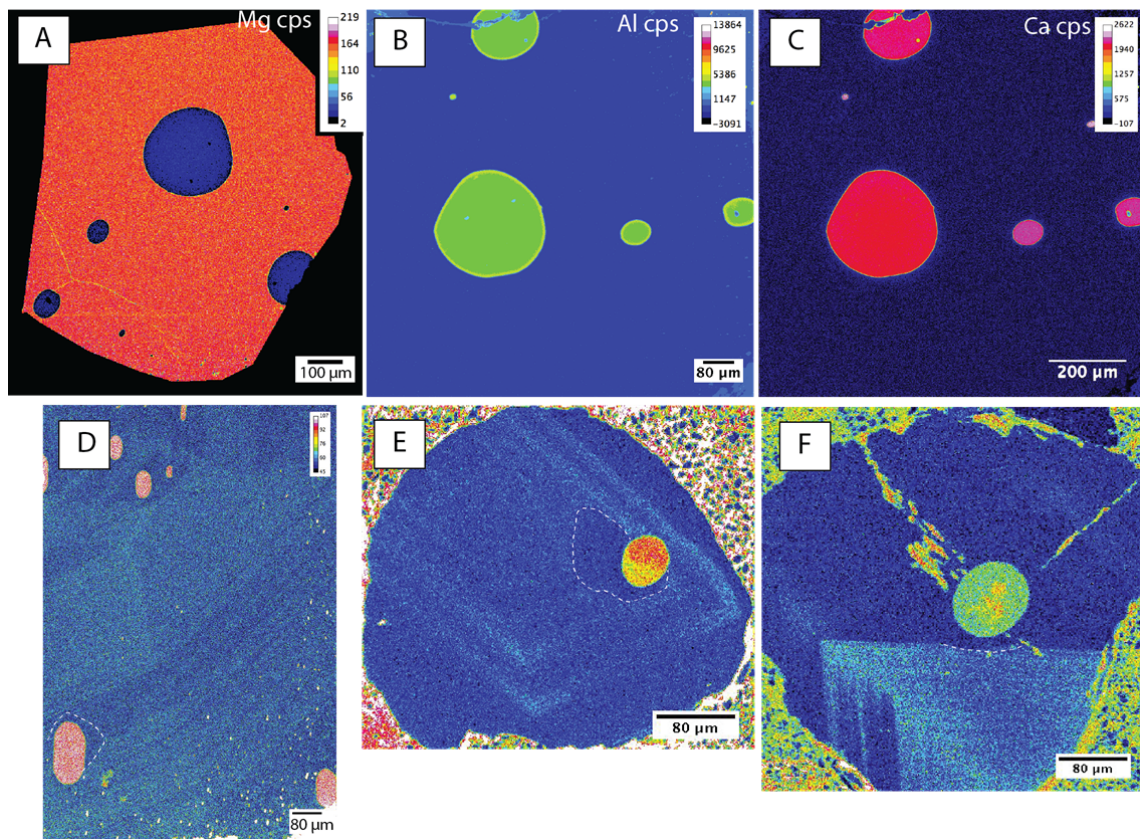

Figure DR2: X-ray maps for A- Mg concentration in ARP73-10-03\_16; B- Al concentration in ARP73-10-03\_16; C- Ca concentration in ARP73-10-03\_16; D- P concentration in CH77-DR6-203\_52; E- P concentration in CH77-DR6-203\_4; F- P concentration in CH77-DR6-203\_8. Note the homogeneity of the olivine in major elements (A, B and C), whereas nice P zonations are present in the same olivine (Figure 1). MI are homogeneous in P, except in Fig. DR2-E. Apparent heterogeneity of this specific MI is explained by the presence of a previous SIMS analysis spot, creating a small topography, able to slightly modify the P signal during P imaging by EMPA.

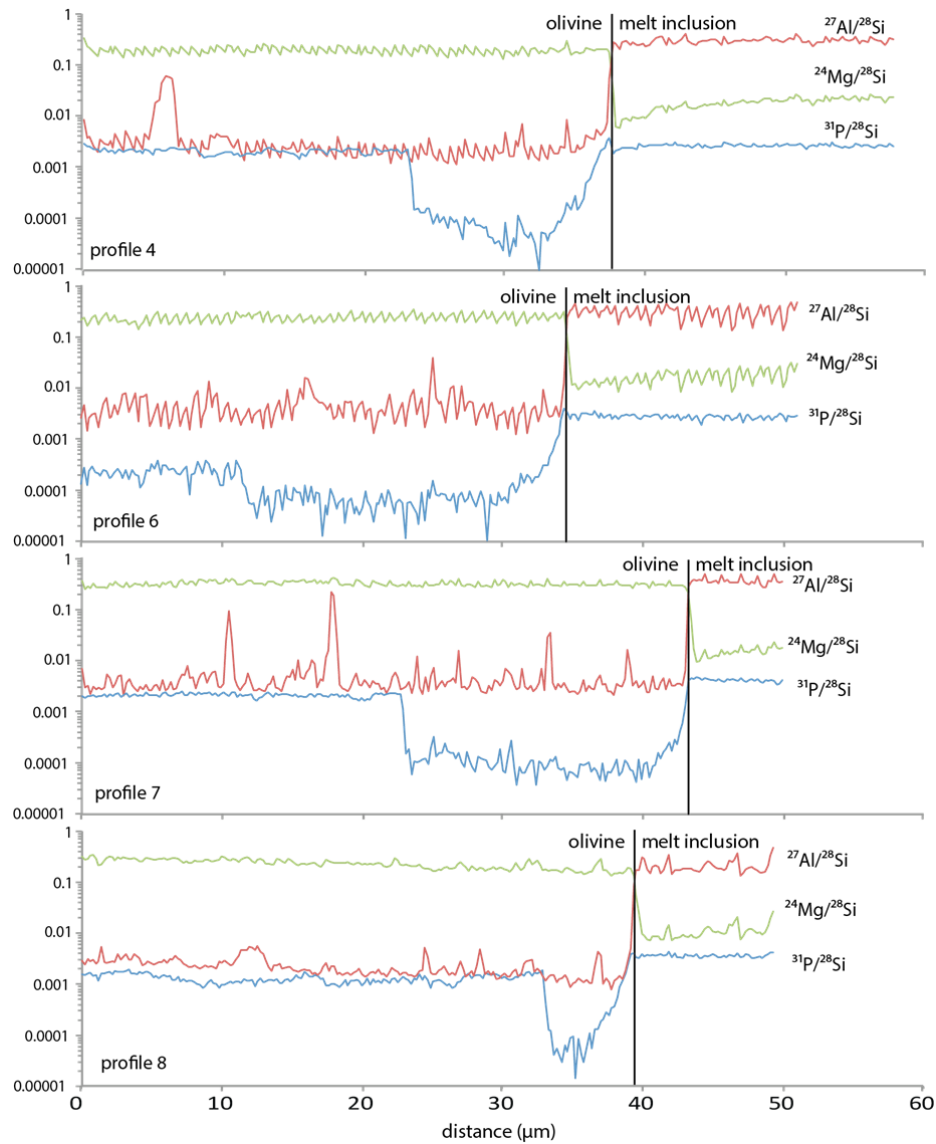

Figure DR3:

$^{31}\text{P}/^{28}\text{Si}$  profiles realized in the ARP73-10-03\_16 olivine and melt inclusions for all the measured elements. The contact between MI and olivine can be determined based on the Mg and Al profiles. The location of the profiles is presented in Figure 1.

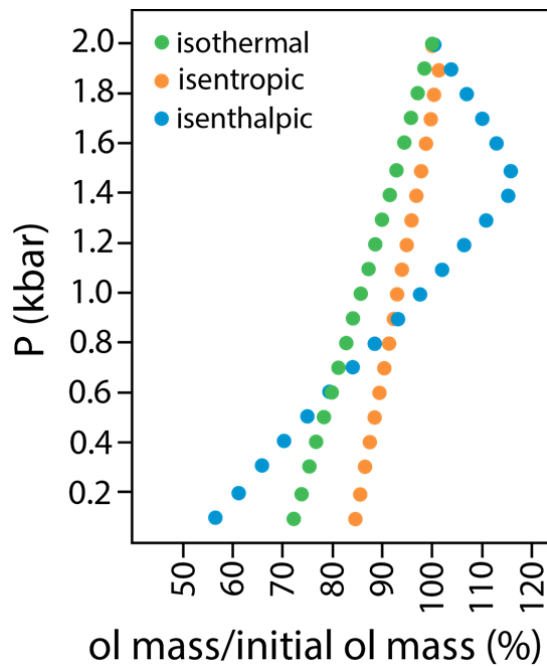

Figure DR4: Results of the MELTS decompression calculations at fixed  $fO_2$  (QFM) between 2 to 0.1 kbar for isothermal, isenthalpic and isentropic decompression. Ol is for olivine. Isentropic and isenthalpic decompression causes weak to moderate initial resorption, while isothermal decompression only causes crystallization.



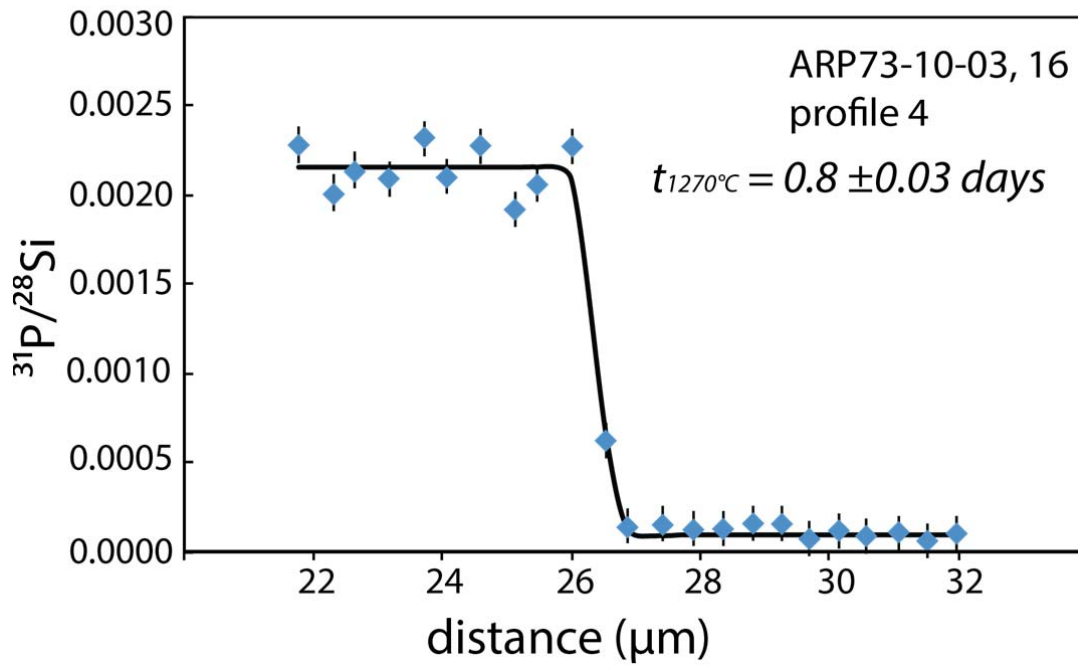

Figure DR5: Comparison of the measured  $^{31}\text{P}/^{28}\text{Si}$  profile in olivine with the calculated curve derived from semi-infinite source diffusion modeling for profile 9, at the contact between P-rich olivine and P-depleted halo. Diffusion was 0.8 days at  $1270^{\circ}\text{C}$ , using  $D$  from Watson et al. (2015). This estimated time scale is a maximum, since the profile is near vertical, and its width is constraint by one point which could represent an analytical artefact. In fact, the profile width could be significantly overestimated.

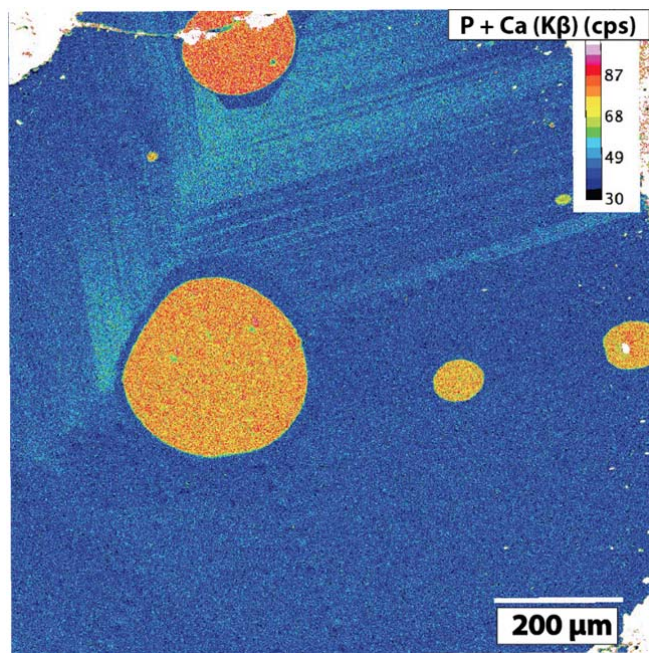

Figure DR6: P distribution in ARP73-10-03\_16 olivine.

## Tables

Table DR1

NanoSIMS measurements of the profile 9 realized in the ARP73-10-13\_16 olivine.

Table DR1

| Distance (um) | 31P (cps) | 28Si (cps) |
|---------------|-----------|------------|
| 18.0858400    | 19        | 97678      |
| 18.3477400    | 26        | 121670     |
| 18.5226800    | 11        | 111065     |
| 18.7845900    | 18        | 126832     |
| 18.9595300    | 18        | 108121     |
| 19.2214400    | 24        | 125457     |
| 19.3963800    | 23        | 105542     |
| 19.6582900    | 34        | 142189     |
| 19.8332200    | 41        | 147602     |
| 20.0951400    | 37        | 145394     |
| 20.2700700    | 37        | 111402     |
| 20.5319900    | 46        | 127164     |
| 20.7069200    | 44        | 102883     |
| 20.9688400    | 72        | 126160     |
| 21.1437600    | 82        | 100907     |
| 21.4056900    | 136       | 117867     |
| 21.5806100    | 92        | 101973     |
| 21.8425400    | 159       | 124376     |
| 22.0174600    | 148       | 106587     |
| 22.2793900    | 149       | 122282     |
| 22.4543000    | 133       | 101183     |
| 22.7162500    | 182       | 119846     |
| 22.8911500    | 157       | 109615     |
| 23.1531000    | 194       | 127241     |
| 23.3280000    | 149       | 108946     |
| 23.5899500    | 145       | 125116     |
| 23.7648500    | 147       | 105254     |
| 24.0268000    | 164       | 124435     |
| 24.2017000    | 125       | 104253     |
| 24.4636500    | 143       | 126520     |
| 24.6385400    | 107       | 108187     |
| 24.9005000    | 93        | 127452     |
| 25.0753900    | 70        | 112467     |
| 25.3373500    | 42        | 129259     |
| 25.5122400    | 33        | 109530     |
| 25.7742000    | 42        | 122799     |
| 25.9490900    | 32        | 109173     |
| 26.2110500    | 42        | 126676     |
| 26.3859400    | 20        | 111107     |

| Distance (um) | 31P (cps) | 28Si (cps) |
|---------------|-----------|------------|
| 26.6479000    | 20        | 133279     |
| 26.8227900    | 21        | 112554     |
| 27.0847500    | 27        | 135998     |
| 27.2596300    | 24        | 119142     |
| 27.5216000    | 33        | 127031     |
| 27.6964800    | 32        | 133735     |
| 27.8716300    | 27        | 115507     |
| 28.1333300    | 23        | 123117     |
| 28.3084800    | 16        | 108431     |
| 28.5701800    | 26        | 124510     |
| 28.7453200    | 17        | 109618     |
| 29.0070300    | 20        | 133930     |
| 29.1821600    | 14        | 126906     |
| 29.4438800    | 23        | 134133     |
| 29.6190000    | 27        | 145317     |
| 29.8807300    | 25        | 147300     |
| 30.0558500    | 25        | 115786     |
| 30.3175800    | 23        | 136501     |
| 30.4926900    | 16        | 126328     |
| 30.7544300    | 24        | 129967     |
| 30.9295300    | 18        | 117576     |
| 31.1912700    | 15        | 135174     |
| 31.3663800    | 18        | 116562     |
| 31.6281200    | 18        | 136904     |
| 31.8032200    | 23        | 121893     |
| 32.0649700    | 22        | 130770     |
| 32.2400700    | 15        | 118591     |
| 32.5018200    | 17        | 142127     |
| 32.6769100    | 15        | 120532     |
| 32.9386700    | 25        | 137011     |
| 33.1137600    | 19        | 121271     |
| 33.3755200    | 32        | 134642     |
| 33.5506000    | 22        | 120888     |
| 33.8123700    | 27        | 136803     |
| 33.9874500    | 20        | 119072     |
| 34.2492200    | 21        | 125619     |
| 34.4242900    | 12        | 106236     |
| 34.6860700    | 14        | 126237     |
| 34.8611400    | 12        | 110990     |

149 Table DR2

150 Major element compositions (determined by EPMA) and P concentration (determined by  
151 SIMS) of the melt inclusions hosted in the ARP73-10-13\_16 olivine. Values measured for  
152 ML3B glass, used as external standard for EPMA glass analyses, are also reported. Major  
153 element concentrations are given in wt% and P concentrations in ppm. For ML3B FeO  
154 represents  $\text{FeO}_{\text{tot}}$ .

Table DR2

| Sample    | SiO2  | TiO2 | Al2O3 | Fe2O3 | FeO   | MnO  | MgO   | CaO   | Na2O | K2O  | % ol added | P (ppm) | 2sd% |
|-----------|-------|------|-------|-------|-------|------|-------|-------|------|------|------------|---------|------|
| ARP73_16a | 49.52 | 0.59 | 14.42 | 0.91  | 7.83  | 0.12 | 12.07 | 12.96 | 1.51 | 0.07 | 10.9       | 374     | 0.07 |
| ARP73_16b | 49.81 | 0.53 | 14.44 | 0.88  | 7.58  | 0.09 | 11.68 | 13.41 | 1.51 | 0.08 | 12.7       | 495     | 0.06 |
| ARP73_16c | 49.71 | 0.55 | 14.53 | 0.87  | 7.63  | 0.14 | 11.80 | 13.28 | 1.43 | 0.06 | 17.0       | 297     | 0.09 |
| ARP73_16d | 48.97 | 0.59 | 14.85 | 0.90  | 7.77  | 0.12 | 11.83 | 13.33 | 1.57 | 0.07 | 17.3       | 311     | 0.08 |
| ML3B      | 51.56 | 2.10 | 13.72 | n.d.  | 11.59 | 0.17 | 6.59  | 10.33 | 2.52 | 0.39 |            | n.d.    |      |

156 Table DR3

157 Results of the MELTs calculations for the three different models tested.

Table DR3

| isothermal decompression |           |           |            | isentropic decompression |           |           |            | isenthalpic decompression |           |           |            |
|--------------------------|-----------|-----------|------------|--------------------------|-----------|-----------|------------|---------------------------|-----------|-----------|------------|
| T (C)                    | P (kbars) | mass (mg) | forsterite | T (C)                    | P (kbars) | mass (mg) | forsterite | T (C)                     | P (kbars) | mass (mg) | forsterite |
| 1240                     | 2         | 5.194     | 84.27      | 1250                     | 2         | 4.1818    | 84.70      | 1230                      | 2         | 5.2288    | 83.59      |
| 1240                     | 1.9       | 5.1211    | 84.30      | 1248.7                   | 1.9       | 4.242     | 84.67      | 1229.6                    | 1.9       | 5.3998    | 83.65      |
| 1240                     | 1.8       | 5.0479    | 84.33      | 1248.3                   | 1.8       | 4.2044    | 84.69      | 1229.1                    | 1.8       | 5.5621    | 83.71      |
| 1240                     | 1.7       | 4.9744    | 84.36      | 1248                     | 1.7       | 4.1666    | 84.71      | 1228.6                    | 1.7       | 5.7184    | 83.76      |
| 1240                     | 1.6       | 4.9005    | 84.40      | 1247.6                   | 1.6       | 4.1286    | 84.72      | 1228.1                    | 1.6       | 5.8691    | 83.82      |
| 1240                     | 1.5       | 4.8262    | 84.43      | 1247.2                   | 1.5       | 4.0904    | 84.74      | 1227.6                    | 1.5       | 6.0147    | 83.87      |
| 1240                     | 1.4       | 4.7516    | 84.46      | 1246.9                   | 1.4       | 4.0521    | 84.76      | 1227.6                    | 1.4       | 5.9872    | 83.92      |
| 1240                     | 1.3       | 4.6767    | 84.50      | 1246.5                   | 1.3       | 4.0135    | 84.77      | 1229.2                    | 1.3       | 5.7603    | 84.02      |
| 1240                     | 1.2       | 4.6014    | 84.53      | 1246.1                   | 1.2       | 3.9748    | 84.79      | 1230.7                    | 1.2       | 5.5322    | 84.12      |
| 1240                     | 1.1       | 4.5258    | 84.56      | 1245.8                   | 1.1       | 3.936     | 84.81      | 1232.3                    | 1.1       | 5.303     | 84.23      |
| 1240                     | 1         | 4.4498    | 84.60      | 1245.4                   | 1         | 3.8969    | 84.83      | 1233.8                    | 1         | 5.0728    | 84.33      |
| 1240                     | 0.9       | 4.3735    | 84.63      | 1245                     | 0.9       | 3.8577    | 84.84      | 1235.4                    | 0.9       | 4.8414    | 84.43      |
| 1240                     | 0.8       | 4.2968    | 84.66      | 1244.6                   | 0.8       | 3.8182    | 84.86      | 1236.9                    | 0.8       | 4.6089    | 84.53      |
| 1240                     | 0.7       | 4.2197    | 84.70      | 1244.3                   | 0.7       | 3.7787    | 84.88      | 1238.5                    | 0.7       | 4.3753    | 84.63      |
| 1240                     | 0.6       | 4.1423    | 84.73      | 1243.9                   | 0.6       | 3.7389    | 84.90      | 1240                      | 0.6       | 4.1406    | 84.73      |
| 1240                     | 0.5       | 4.0645    | 84.77      | 1243.5                   | 0.5       | 3.6989    | 84.92      | 1241.6                    | 0.5       | 3.9048    | 84.83      |
| 1240                     | 0.4       | 3.9864    | 84.80      | 1243.2                   | 0.4       | 3.6588    | 84.94      | 1243.1                    | 0.4       | 3.6678    | 84.93      |
| 1240                     | 0.3       | 3.9079    | 84.83      | 1242.8                   | 0.3       | 3.6185    | 84.95      | 1244.6                    | 0.3       | 3.4297    | 85.03      |
| 1240                     | 0.2       | 3.829     | 84.87      | 1242.4                   | 0.2       | 3.578     | 84.97      | 1246.1                    | 0.2       | 3.1905    | 85.13      |
| 1240                     | 0.1       | 3.7497    | 84.90      | 1242                     | 0.1       | 3.5373    | 84.99      | 1247.6                    | 0.1       | 2.9501    | 85.23      |

## References

- Crank, J., 1975. The mathematics of diffusion, Oxford University Press.  
doi:10.1016/0306-4549(77)90072-X
- Danyushevsky, L. V., Plechov, P., 2011. Petrolog3: Integrated software for modeling crystallization processes. *Geochemistry, Geophys. Geosystems* 12. doi:10.1029/2011GC003516
- Danyushevsky, L. V, Della, F.N., Sokolov, S., 2000. Re-equilibration of melt inclusions trapped by magnesian olivine phenocrysts from subduction-related magmas : petrological implications. *Contrib. to Mineral. Petrol.* 138, 68–83.
- Danyushevsky, L. V, Sokolov, S., Falloon, T.J., 2002. Melt Inclusions in Olivine Phenocrysts : Using Diffusive Re-equilibration to Determine the Cooling History of a Crystal , with Implications for the Origin of Olivine-phyric Volcanic Rocks. *J. Petrol.* 43, 1651–1671.  
doi:10.1093/petrology/43.9.1651
- Ghiorso, M.S., Sack, R.O., 1995. Chemical mass transfer in magmatic processes IV . A revised and internally consistent thermodynamic model for the interpolation and extrapolation of liquid-solid equilibria in magmatic systems at elevated temperatures and pressures. *Contrib. to Mineral. Petrol.* 119, 197–212.
- Press, W.H., Flannery, B.P., Teukolsky, S.A., Vetterling, A. t., 1992. *Numerical Recipes in C: The Art of Scientific Computing*. New York, cambrige Univ. Press 2nd ed, 994 p.
- Watson, E.B., Cherniak, D.J., Holycross, M.E., 2015. Diffusion of phosphorus in olivine and molten basalt. *Am. Mineral.* 100, 2053–2065.  
doi:10.2138/am-2015-5416
- Welsch, B., Hammer, J., Hellebrand, E., 2014. Phosphorus zoning reveals dendritic architecture of olivine. *Geology* 42, 867–870.  
doi:10.1130/G35691.1
